# Supplementary material for: pH-responsive and biodegradable polymeric micelles based on poly(β-amino ester)-graft-phosphorylcholine for doxorubicin delivery
Source: Royal Society of Chemistry journal article supplement (doi:10.1039/c3py00139c), 2013-01-01
Supplement: c3py00139c.pdf [file c3py00139c.pdf]

Electronic supplementary information

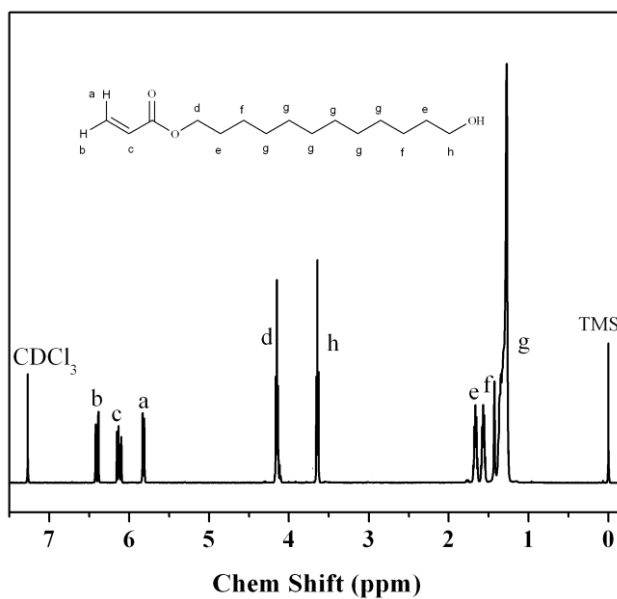

Figure S1. <sup>1</sup>H NMR spectrum of 12-hydroxydodecyl acrylate (CDCl<sub>3</sub>).

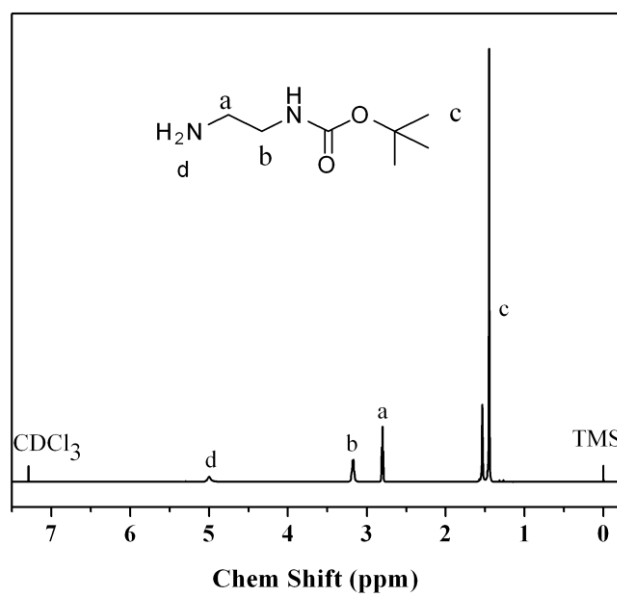

Figure S2. <sup>1</sup>H NMR spectrum of *N*-Boc-ethylenediamine (CDCl<sub>3</sub>).
